# Supplementary material for: Determinants of rabies pre-exposure prophylaxis vaccination willingness among pet hospital staff in Guiyang, China: a cross-sectional study
Source: Research Square preprint supplement (doi:10.21203/rs.3.rs-6625650/v1), 2025-09-22
Supplement: Supplementary file 1 [file 61674ea269a494da66cf5a68.docx]

Rabies Pre-Exposure Prophylaxis Awareness Questionnaire

informed consent

Dear Sir/Madam.

Hello! We are from the Center for Disease Control and Prevention of Guizhou Province, first of all, thank you very much for your participation in this questionnaire.

The purpose of this survey is to understand the current knowledge, vaccination rate and influencing factors of human rabies vaccine pre-exposure vaccination among the staff of pet hospitals in our city, in order to provide a scientific and reasonable theoretical basis for further guiding interventions to improve the pre-exposure knowledge and vaccination rate of rabies. This survey is for academic research only, and the results will be kept confidential. There is no right or wrong answer to all the questions, please answer according to your actual situation, this questionnaire will take about 3-5 minutes. We can provide you with advice and guidance on the health issues involved in the survey.

This survey is completely voluntary. Whether or not you participate in the survey will not have any impact on your work or life. During the research period, if any problem occurs in the survey or if you need to consult about it, you can contact the researchers. Contact person:Deng Yuanyuan 18608512428.

We sincerely hope that this survey will receive your great support and cooperation! If you would like to participate in the survey, please begin answering the questions.

1. Basic personal information

1.1 Your gender:

· male

· women

1.2 Your age:

· 18-25 years

· 26-35 years

· 36-45 years

· 46 years and over

1.3 Your academic qualifications:

· Not officially attending school

· secondary schools

· junior high school

· High school (including junior colleges and technical schools)

· Bachelor's degree (including college)

· Master's degree and above

1.4 Your post:

1.5 You have (years) of experience in this position:

1.6 The area of your pet hospital is:

II. Knowledge-credit-action component

2.1 Have you ever been injured by an animal?

· be

· No (skip to 2.3)

2.2 Approximately how often have you been injured by animals in a year?

· 1-3 times

· 4-5 times

· 5more than once

2.3 What do you think are some of the ways to prevent rabies (multiple responses allowed):

· Sterilization after rinsing

· Vaccinate animals against rabies

· Going to hospital for human rabies vaccination after being injured by an animal (post-exposure prophylaxis)

· Get human rabies vaccination (pre-exposure prophylaxis) before being injured by an animal.

2.4 Do you think you are at risk for rabies?

· be

· clogged

2.5 Do you think you can get a rabies vaccine to prevent rabies before an injury?

· can

· may not

· I don't know.

2.6 Have you ever been vaccinated against rabies?

· be

· No (skip to 2.8)

2.7 Under what circumstances did you receive human rabies vaccine?

· Before being injured by an animal (skip to 2.9)

· After being injured by an animal

2.8 Compared to post-injury human rabies vaccination (28 days, 5 doses), pre-injury rabies vaccination (21 days, 3 doses) takes less time, requires fewer doses, and eliminates the need for expensive and painful rabies immune globulin. In summary, if you have never received a human rabies vaccine, would you like to prevent rabies by receiving a human rabies vaccine before an animal injures you (pre-exposure):

· Willingness (skip to 2.10)

· Hesitation (skip to 2.11)

· Unwilling (skip to 2.11)

2.9 By what means did you learn that you can get a rabies vaccine before being injured by an animal? (Multiple answers allowed)

· Social media (Jitterbug, WeChat, etc.)

· Hospitals have organized training on the subject

· Surrounding people told

· Promotional materials for vaccination units

· (sth. or sb) else

2.10 Why would you like to be vaccinated against human rabies before an animal injures you (pre-exposure)? (Multiple answers allowed.)

· Can effectively prevent rabies

· Can reduce inoculation time

· You can reduce your expenses.

· Can reduce severe pain from rabies immune globulin injections

· It reduces anxiety.

· The cost of the inoculation is borne by the hospital

· (sth. or sb) else

2.11 Reasons why you are hesitant/unwilling to receive human rabies vaccine before an animal injures you (pre-exposure) (Multiple answers allowed,)

· You don't need to be inoculated if you're not injured.

· Safe for injured animals (not out of the house or animal is vaccinated), no vaccination needed

· Concerns about the safety of the vaccine

· Concerns about the effectiveness of the vaccine

· High economic costs (more money)

· High time cost (more runs)

· Didn't know you could vaccinate against it before you get hurt.

· I don't know where to call.

· (sth. or sb) else

2.12 Who pays for the cost of rabies vaccination if you are injured by an animal at work:

·patients

·persons

·depending on the situation

2.13 Would you be willing to recommend people around you (coworkers, pet owners, etc.) to receive human rabies vaccine to prevent rabies before being injured by an animal (pre-exposure)?

· be

· clogged
